# Supplementary material
Source: PubMed Central journal article supplement (PMC2878036)
Supplement: supp_M109.082370_jbc.M109.082370-1.pdf [file supp_M109.082370_jbc.M109.082370-1.pdf]

## **Supplemental Information**

### **Supplemental Figure Legends:**

**Supplemental Figure S1: IP<sub>6</sub> does not affect the association of Gle1 and Dbp5 *in vitro*.**

Recombinant GST-Dbp5 and Gle1 were incubated with glutathione resin in the presence or absence of IP<sub>6</sub>. Resin was washed and SDS sample buffer added. Samples were diluted and immunoblotted using Dbp5 and Gle1 antibodies.

**Supplemental Figure S2: Sequence alignment of Gle1 across species.**

The sequence alignment of Gle1 protein orthologues from different organisms (excerpted in Figure 2A) is shown in full. Alignment was performed with a modified Clustal-W algorithm. P-values were obtained from a pair-wise comparison with scGle1 for the highest scoring segment, which included up to 81% of the sequences in each pair and included the sequences shown in Figure 2A.

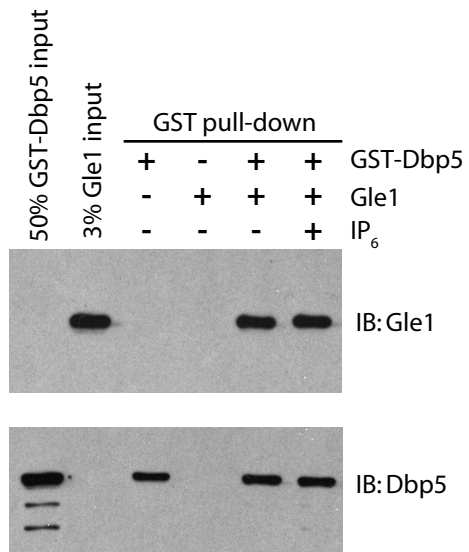

**Supplemental Figure S1**

*S. cerevisiae* -----  
*C. albicans* -----  
*C. tropicalis* -----  
*L. elongisporus* -----  
*S. pombe* -----  
*C. guilliermondii* -----  
*C. lusitanae* -----  
*M. musculus* -----  
*G. gallus* -----  
*R. norvegicus* -----  
*H. sapiens* -----  
*D. rerio* -----

*S. cerevisiae* -----  
*C. albicans* -----  
*C. tropicalis* -----  
*L. elongisporus* -----  
*S. pombe* -----  
*C. guilliermondii* -----  
*C. lusitanae* -----  
*M. musculus* -----  
*G. gallus* -----  
*R. norvegicus* -----  
*H. sapiens* -----  
*D. rerio* -----

*S. cerevisiae* -----  
*C. albicans* -----  
*C. tropicalis* -----  
*L. elongisporus* -----  
*S. pombe* -----  
*C. guilliermondii* -----  
*C. lusitanae* -----  
*M. musculus* -----  
*G. gallus* -----  
*R. norvegicus* -----  
*H. sapiens* -----  
*D. rerio* -----

*S. cerevisiae* -----  
*C. albicans* -----  
*C. tropicalis* -----  
*L. elongisporus* -----  
*S. pombe* -----  
*C. guilliermondii* -----  
*C. lusitanae* -----  
*M. musculus* -----  
*G. gallus* -----  
*R. norvegicus* -----  
*H. sapiens* -----  
*D. rerio* -----

*S. cerevisiae* -----  
*C. albicans* -----  
*C. tropicalis* -----  
*L. elongisporus* -----  
*S. pombe* -----  
*C. guilliermondii* -----  
*C. lusitanae* -----  
*M. musculus* -----  
*G. gallus* -----  
*R. norvegicus* -----  
*H. sapiens* -----  
*D. rerio* -----

*S. cerevisiae* -----  
*C. albicans* -----  
*C. tropicalis* -----  
*L. elongisporus* -----  
*S. pombe* -----  
*C. guilliermondii* -----  
*C. lusitanae* -----  
*M. musculus* -----  
*G. gallus* -----  
*R. norvegicus* -----  
*H. sapiens* -----  
*D. rerio* -----

*S. cerevisiae* -----  
*C. albicans* -----  
*C. tropicalis* -----  
*L. elongisporus* -----  
*S. pombe* -----  
*C. guilliermondii* -----  
*C. lusitanae* -----  
*M. musculus* -----  
*G. gallus* -----  
*R. norvegicus* -----  
*H. sapiens* -----  
*D. rerio* -----

|                          |          |
|--------------------------|----------|
| <i>C. albicans</i>       | 1.00E-86 |
| <i>C. tropicalis</i>     | 4.00E-98 |
| <i>L. elongisporus</i>   | 8.00E-79 |
| <i>S. pombe</i>          | 3.00E-53 |
| <i>C. guilliermondii</i> | 9.00E-77 |
| <i>C. lusitanae</i>      | 2.00E-74 |
| <i>M. musculus</i>       | 7.00E-18 |
| <i>G. gallus</i>         | 6.00E-20 |
| <i>R. norvegicus</i>     | 6.00E-18 |
| <i>H. sapiens</i>        | 3.00E-16 |
| <i>D. rerio</i>          | 1.00E-21 |

Supplemental Figure S2
